# Supplementary material for: Fumaric Acid Production by R. arrhizus NRRL 1526 Using Apple Pomace Enzymatic Hydrolysates: Kinetic Modelling
Source: MDPI journal article supplement (doi:10.3390/pr10122624), 2022-12-07
Supplement: s1 [file s1]

Archive with 1 entries (1 files):
- processes-2002282-supplementary.pdf
